# Supplementary figures and images for: The Quintuple Helix innovation model: global warming as a challenge and driver for innovation
Source: Springer Nature journal article supplement (doi:10.1186/2192-5372-1-2), 2012-01-01

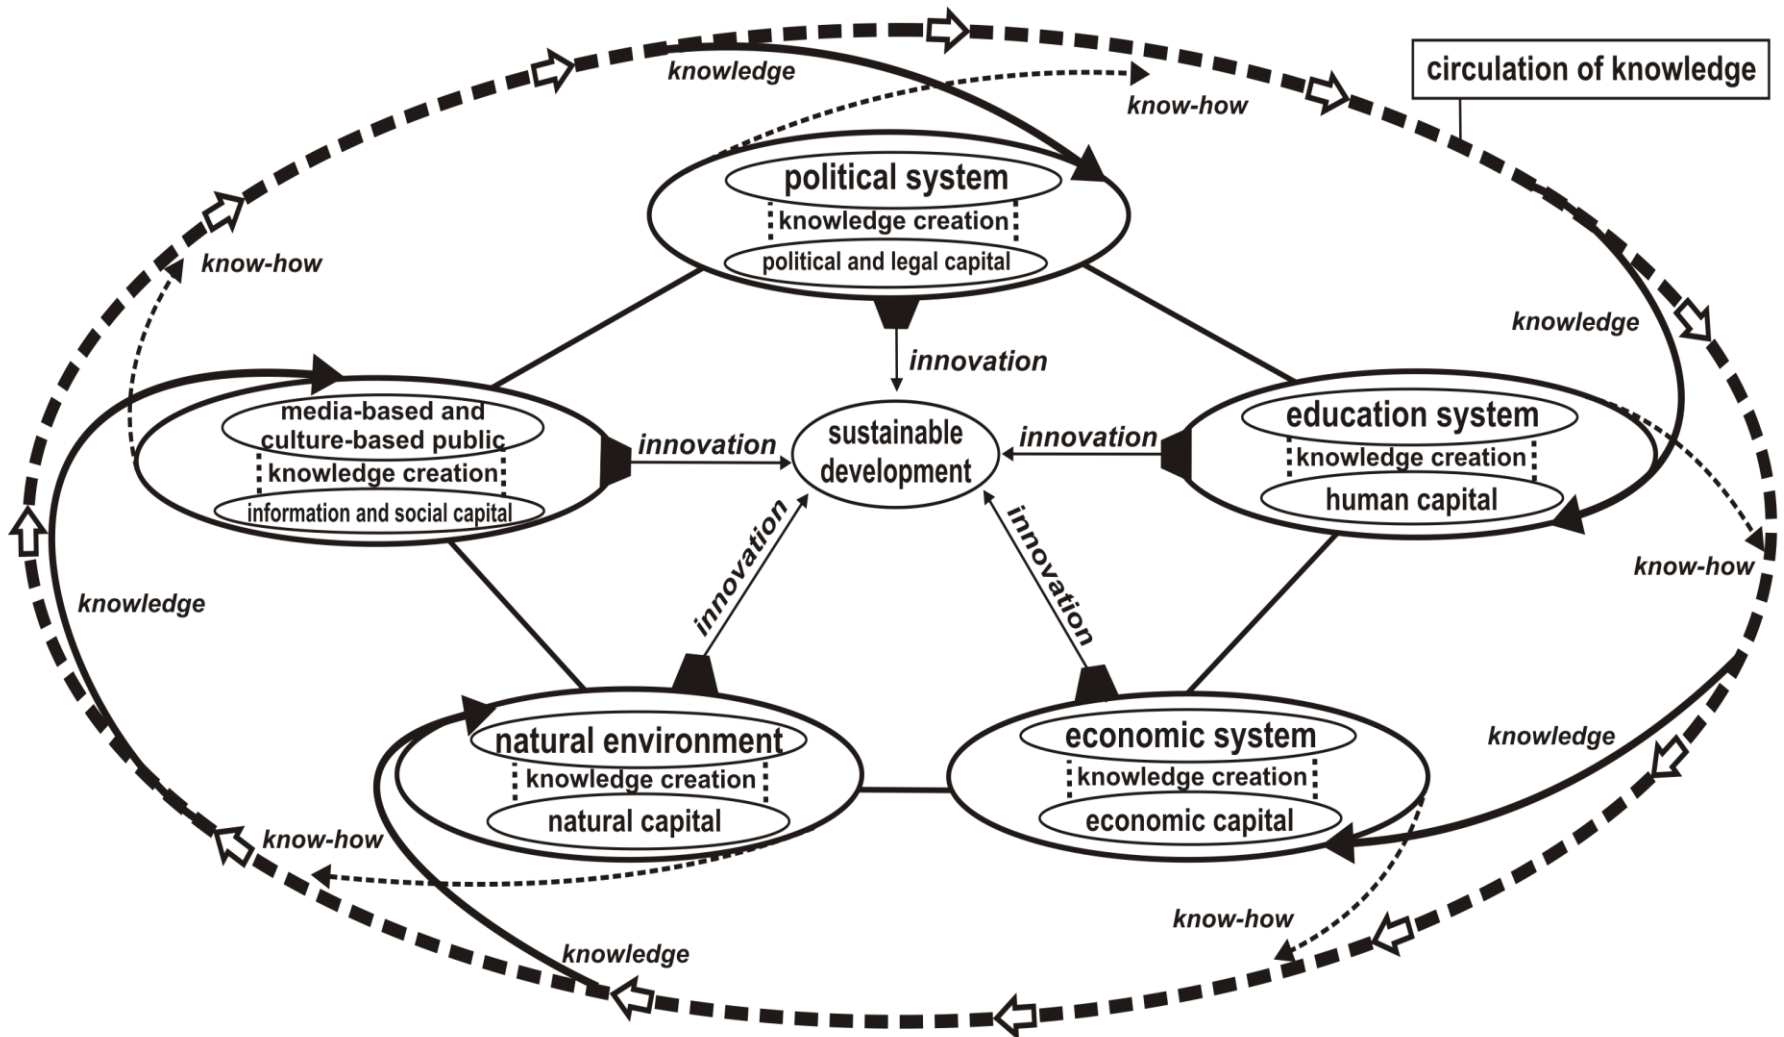

Supplement: 13731_2012_2_MOESM4_ESM.pdf [file 13731_2012_2_MOESM4_ESM.pdf]
